# Supplementary material for: MOF-derived porous carbon inlaid with MnO2 nanoparticles as stable aqueous Zn-ion battery cathodes
Source: Royal Society of Chemistry journal article supplement (doi:10.1039/d1dt03157k), 2021-01-01
Supplement: d1dt03157k1.pdf [file d1dt03157k1.pdf]

# Supporting Information

of the paper entitled

**MOF-derived Porous Carbon Inlaid with MnO<sub>2</sub> Nanoparticles as  
Stable Aqueous Zn-ion Battery Cathodes**

## **Experimental Section**

### **1. Materials**

Cobalt(II) nitrate hexahydrate ( $\text{Co}(\text{NO}_3)_2 \cdot 6\text{H}_2\text{O}$ , 99 %, National Medicine Co., Ltd.), 2-methylimidazole ( $\text{C}_4\text{H}_6\text{N}_2$ , 99 %, National Medicine Co., Ltd.), Manganese sulfate ( $\text{MnSO}_4$ , 99 %, National Medicine Co., Ltd.), Zinc sulfate ( $\text{ZnSO}_4$ , 99 %, National Medicine Co., Ltd.),  $\text{CH}_3\text{OH}$  and  $\text{HCl}$  in this experiment were acquired from Aladdin Ltd., Poly-(vinylidene fluoride) (PVDF) and carbon black were purchased from National Medicine Co., Ltd.. All of the reagents were of analytical purity and were used as received.

### **2. Preparation of CoMOF**

4 mmol of cobalt nitrate and 20 mmol of 2-methylimidazole were dissolved in 100 mL of methanol, mixed rapidly and stirred vigorously for 30 s. After stirring, the mixture was left to stand at  $25^\circ\text{C}$  for 24 h. After standing, the mixture was washed by alternate filtration with methanol and deionised water and dried, and the purple powder was collected as CoMOF.

### **3. Preparation of C-CoMOF**

Some of the CoMOF obtained in step 2 was calcined under Ar atmosphere at  $2^\circ\text{C}/\text{min}$  to  $100^\circ\text{C}$  for 1h and then continued to calcine at a rate of  $5^\circ\text{C min}^{-1}$  to  $900^\circ\text{C}$  for 4h. The black powder collected above was crushed and dispersed in 1 M  $\text{HCl}$ , stirred and sonicated for 24h, then washed three times with deionised water and collected as C-CoMOF.

### **4. Preparation of C-CoMOF-MnO<sub>2</sub>**

An appropriate amount of C-CoMOF homogeneous powder was dispersed into a 50% solution of manganese nitrate, stirred and sonicated for 24 h. After stirring, the black viscous gelatinous mixture was collected by filtration and calcined in air at  $1\text{ }^{\circ}\text{C min}^{-1}$  to  $150\text{ }^{\circ}\text{C}$  for 2 h. After burning, the solid was ground and collected to obtain C-CoMOF-MnO<sub>x</sub> (which contains a small amount of cobalt metal monomers).

### **5. Preparation of MnO<sub>2</sub>**

A 50% solution of manganese nitrate is calcined directly in air at  $1\text{ }^{\circ}\text{C min}^{-1}$  up to  $150\text{ }^{\circ}\text{C}$  for 2h, after which the solid is ground and collected homogeneously to obtain MnO<sub>2</sub>.

### **6. Preparation of anode and electrolyte**

High purity zinc flakes (99%) are first soaked in acetone for 15min and then dried by ultrasonic cleaning with alcohol for 10 minutes. The electrolyte was easily mixed with 3 M ZnSO<sub>4</sub> + 0.1 M MnSO<sub>4</sub>.

### **7. Characterization of Materials**

The crystal structure of the products are identified by X-ray diffraction (XRD) using a Bruker/Vertex 70 X-ray diffractometer with range of  $5^{\circ}$ - $80^{\circ}$ . The morphology and microstructure are observed by the field emission scanning electron microscope (JEOL JEM-2100F). Transmission electron microscope (TEM) and high resolution Transmission electron microscope (HRTEM) were performed on Titan G2 60-300. Valence states measurements were analysed with X-ray photoelectron spectroscopy (XPS, ESCALAB250Xi). And binding energies (BEs) of the elements were calibrated against the reference BE at 284.8 eV for the C 1s peak. FT-IR spectrums were

performed on IRAffinity-1/SHIMADZU. Thermogravimetric analysis (TGA) was conducted under air atmosphere with a heating rate of  $10\text{ }^{\circ}\text{C min}^{-1}$  on a MS coupled thermogravimetric analyser (TA Instruments Q600SDT).

### **8. Electrochemical Performance Characterization**

The batteries were assembled using the C-MnO<sub>2</sub> electrode as the cathode, organic glass fiber as the separator and Zn foil (thickness: 0.1mm, diameter: 15mm) as the anode in CR 2016 coin cells. 3 M ZnSO<sub>4</sub> + 0.1 M MnSO<sub>4</sub> aqueous solution was used as the electrolytes. The working electrode was prepared by mixing carbon coated C-MnO<sub>2</sub> (70 wt%), conductive carbon (Super-P, 20 wt%), and polyvinylidene flluoride (PVDF, 10 wt%), using N-methyl-2-pyrrolidone as solvent. The obtained slurry was cast onto stainless steel wire mesh (sswm) and dried in a vacuum oven at 80°C for 12 h. Cyclic voltammetry (CV) was carried out using CHI 660E electrochemical work station. Galvanostatic charge/discharge (GCD) tests were performed in the potential range of 0.8 to 1.8 V. The galvanostatic intermittent titration technique (GITT) was applied to analyze the reaction and diffusion kinetics at a current density of 100 mA g<sup>-1</sup> and a charge/discharge time and interval of 10 min for each step.

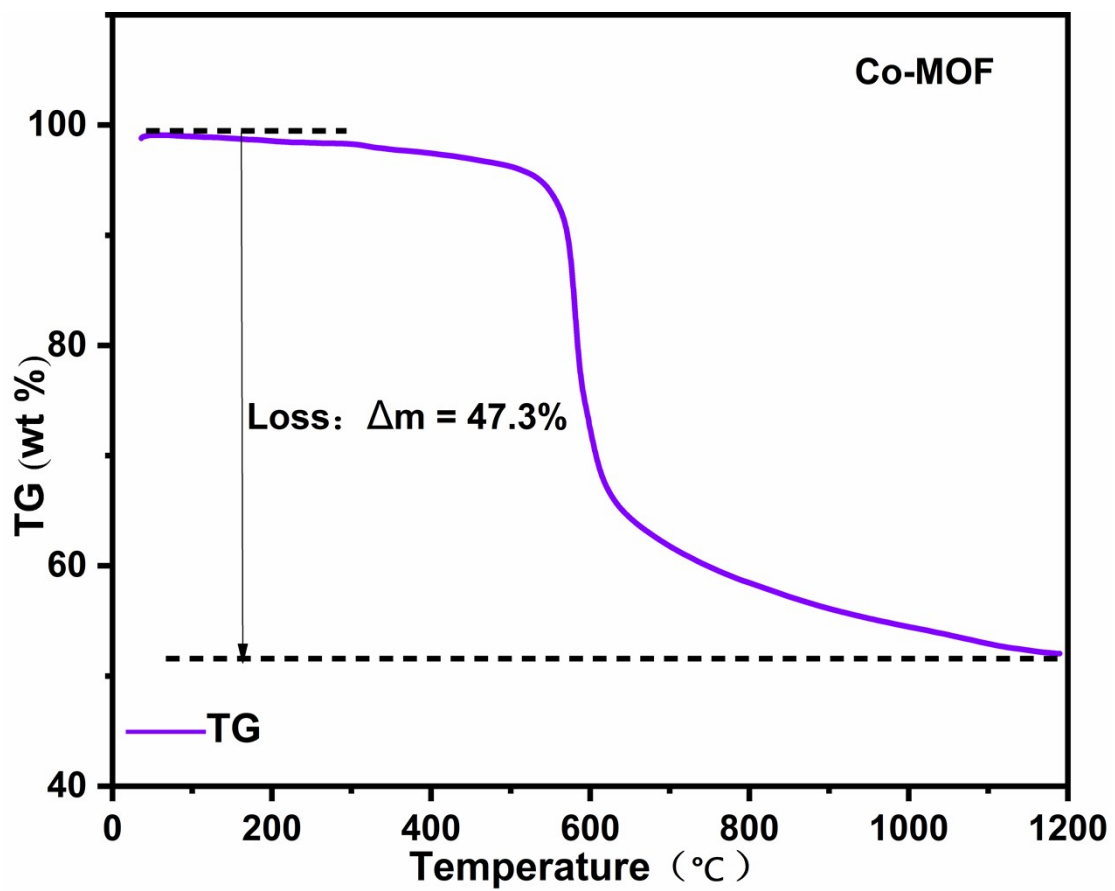

Figure S1 The thermogravimetric curve of Co-MOF

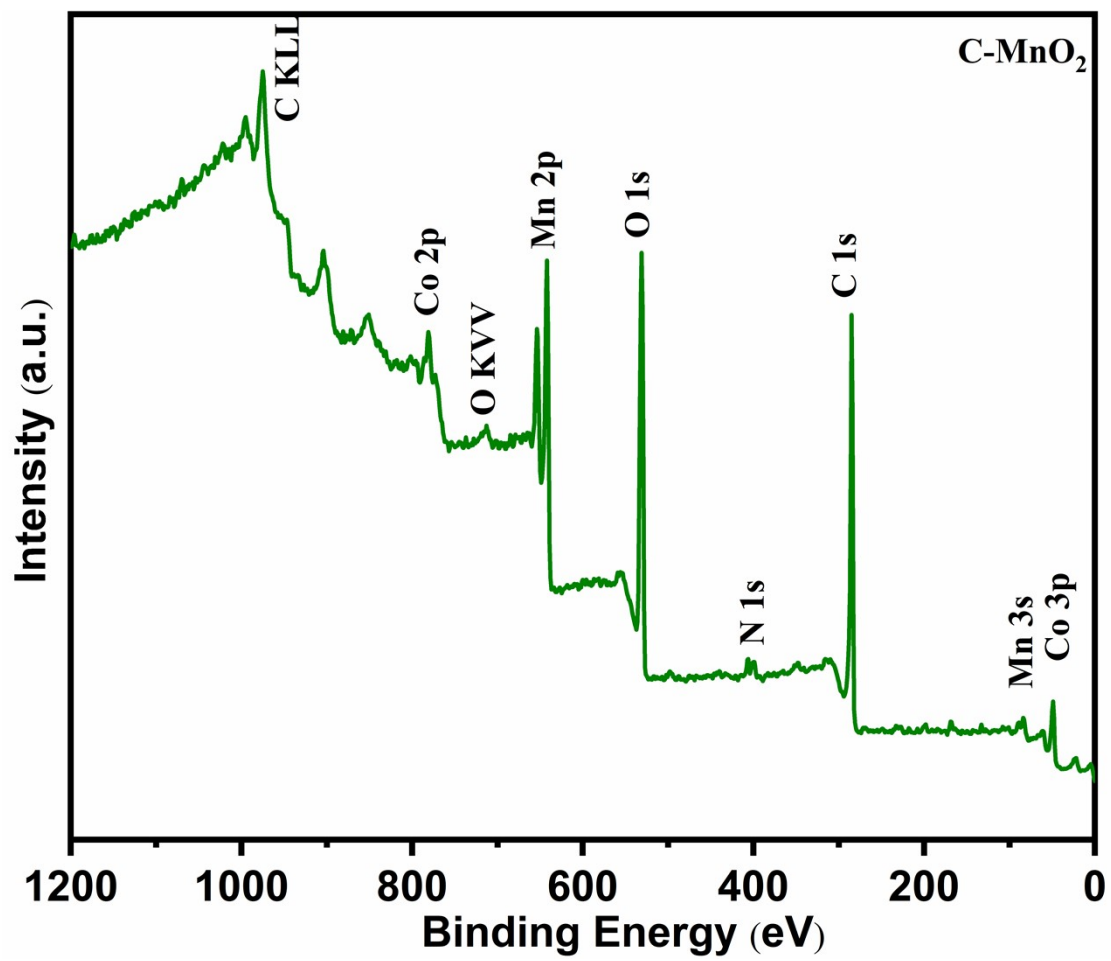

Figure S2 XPS survey spectra of C-MnO<sub>2</sub>

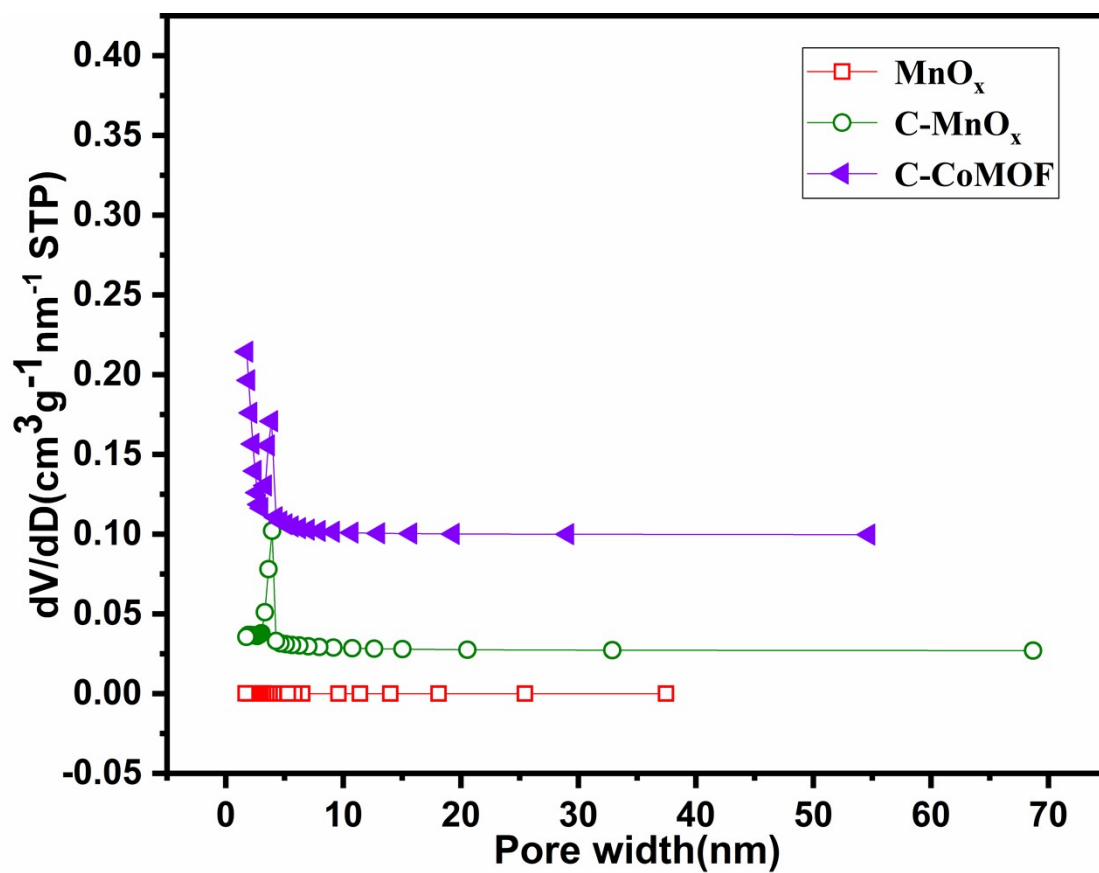

Figure S3 Pore size distribution of C-MnO<sub>2</sub>

**Table S1** Specific surface area of different electrodes

| <b>Cathode</b>                                               | <b>C-CoMOF</b> | <b>C-MnO<sub>2</sub></b> | <b>MnO<sub>2</sub></b> |
|--------------------------------------------------------------|----------------|--------------------------|------------------------|
| <b>Surface area</b><br><b>(m<sup>2</sup> g<sup>-1</sup>)</b> | 502            | 136                      | 0.4                    |



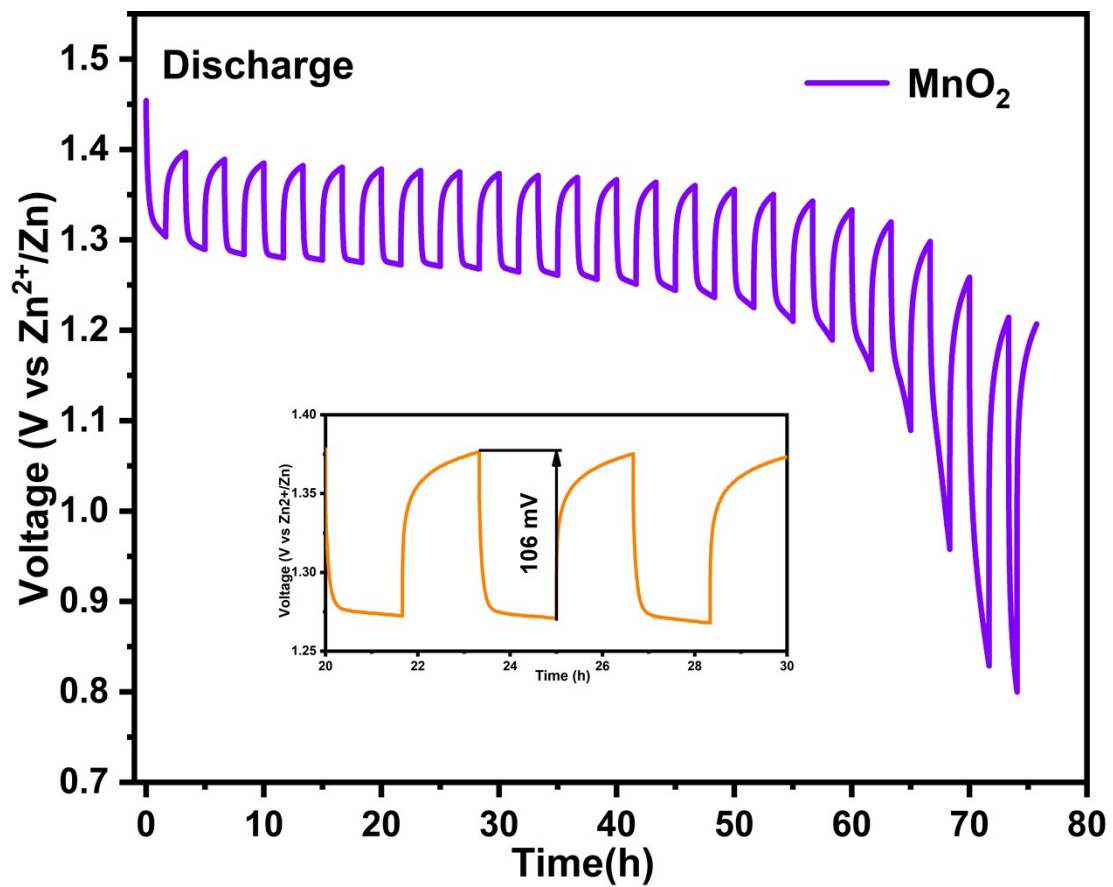

Figure S4 GITT curve of MnO<sub>2</sub>

**Table S2** Overpotential of ohmic impedance and charge transfer impedance & ion diffusion

| <b>Cathode</b>                      | <b>C-MnO<sub>2</sub></b> |           |            | <b>MnO<sub>2</sub></b> |
|-------------------------------------|--------------------------|-----------|------------|------------------------|
|                                     | <b>I</b>                 | <b>II</b> | <b>III</b> |                        |
| <b>IR drop / mV</b>                 | 25                       | 90        | 40         | 50                     |
| <b><math>\Delta E_t</math> / mV</b> | 33                       | 0         | 230        | 56                     |
| <b>Total</b>                        | 58                       | 90        | 270        | 106                    |

**Table S3** Passivation and broadening of peaks at different scanning rates for C-MnO<sub>2</sub> and MnO<sub>2</sub>

| <b>Cathode</b>             | <b>C-MnO<sub>2</sub></b> |                 | <b>MnO<sub>2</sub></b> |                 |
|----------------------------|--------------------------|-----------------|------------------------|-----------------|
| <b>Scan rate</b>           | <b>Angle</b>             | <b>Width</b>    | <b>Angle</b>           | <b>Width</b>    |
| <b>(mV s<sup>-1</sup>)</b> | <b>(Peak 1)</b>          | <b>(Peak 4)</b> | <b>(Peak 1)</b>        | <b>(Peak 4)</b> |
| <b>0.2</b>                 | 43 °                     | 210 mV          | 34 °                   | 150 mV          |
| <b>0.4</b>                 | 50 °                     | 189 mV          | 36 °                   | 152 mV          |
| <b>0.8</b>                 | >90 °                    | 175 mV          | 50 °                   | 134 mV          |

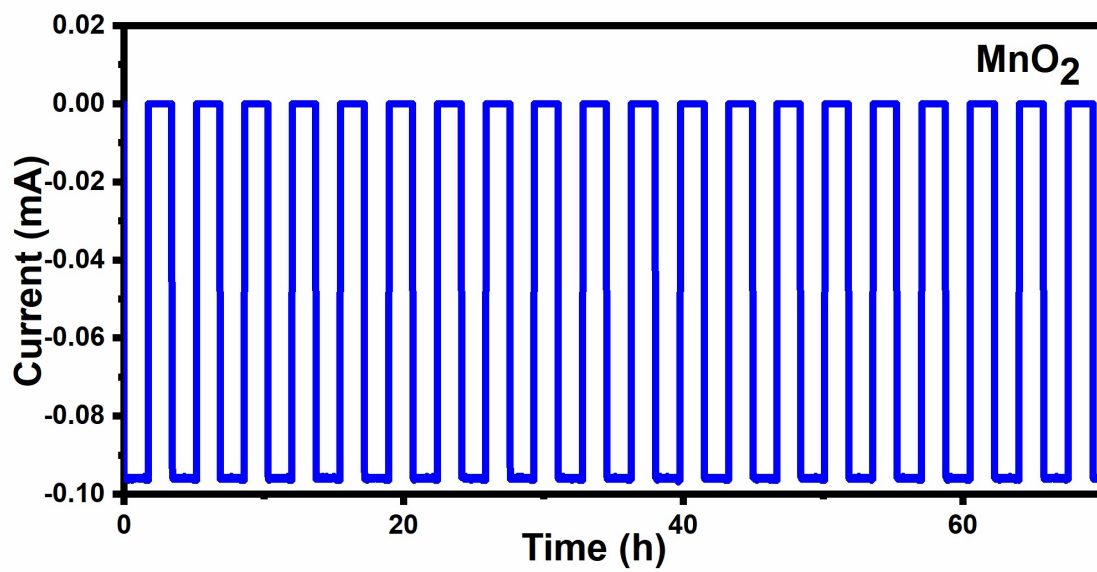

Figure S5 Current of GITT at 1<sup>st</sup> discharge (MnO<sub>2</sub>)

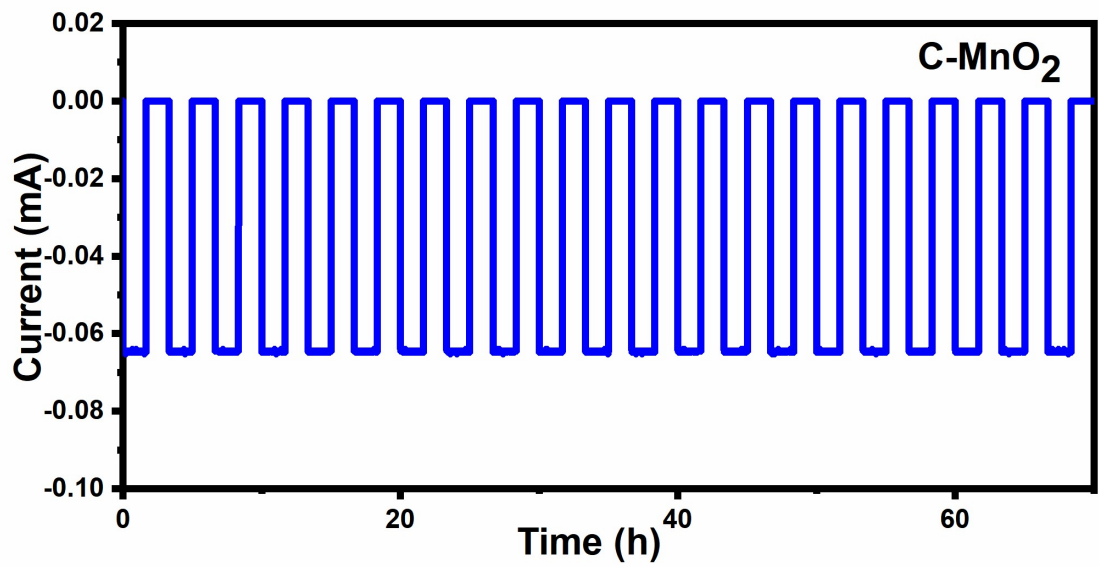

Figure S6 Current of GITT at 1<sup>st</sup> discharge (C-MnO<sub>2</sub>)

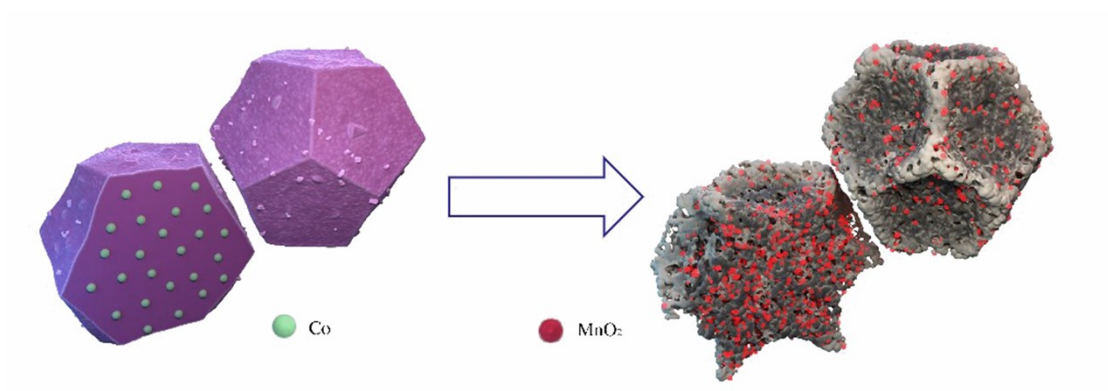

**Figure S7** Schematic diagram of the preparation of C-MnO<sub>2</sub>

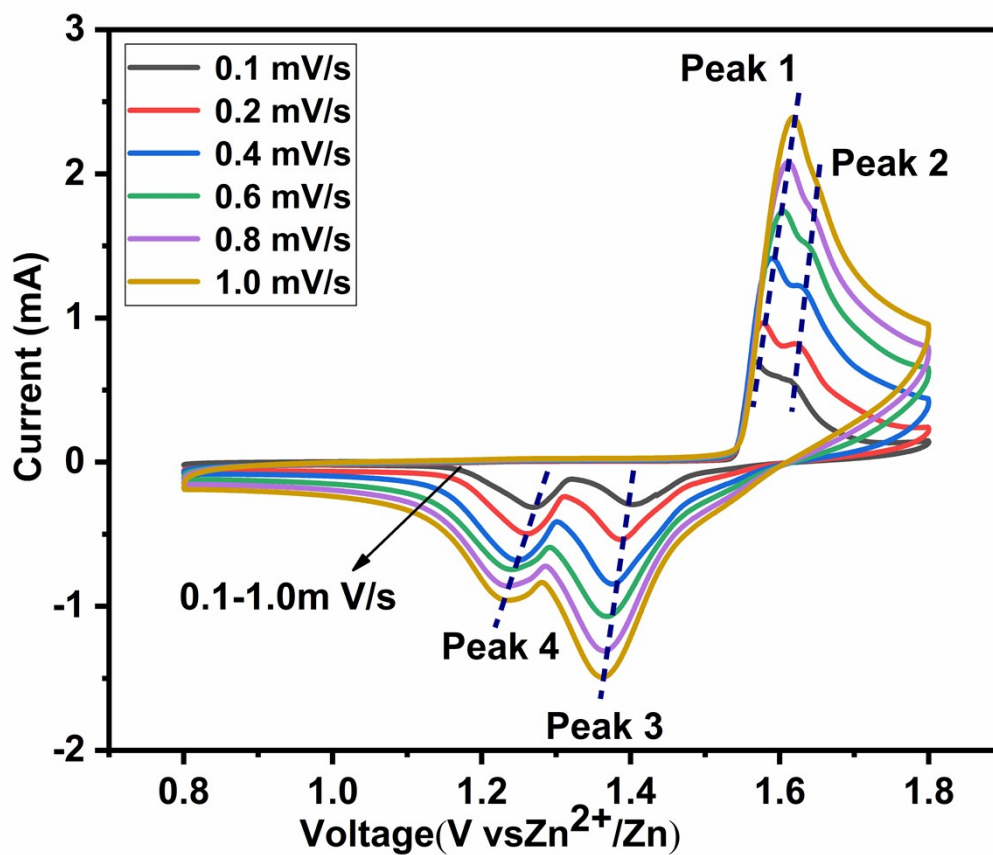

Figure S8 CV curves of MnO<sub>2</sub> at different scanning rates.

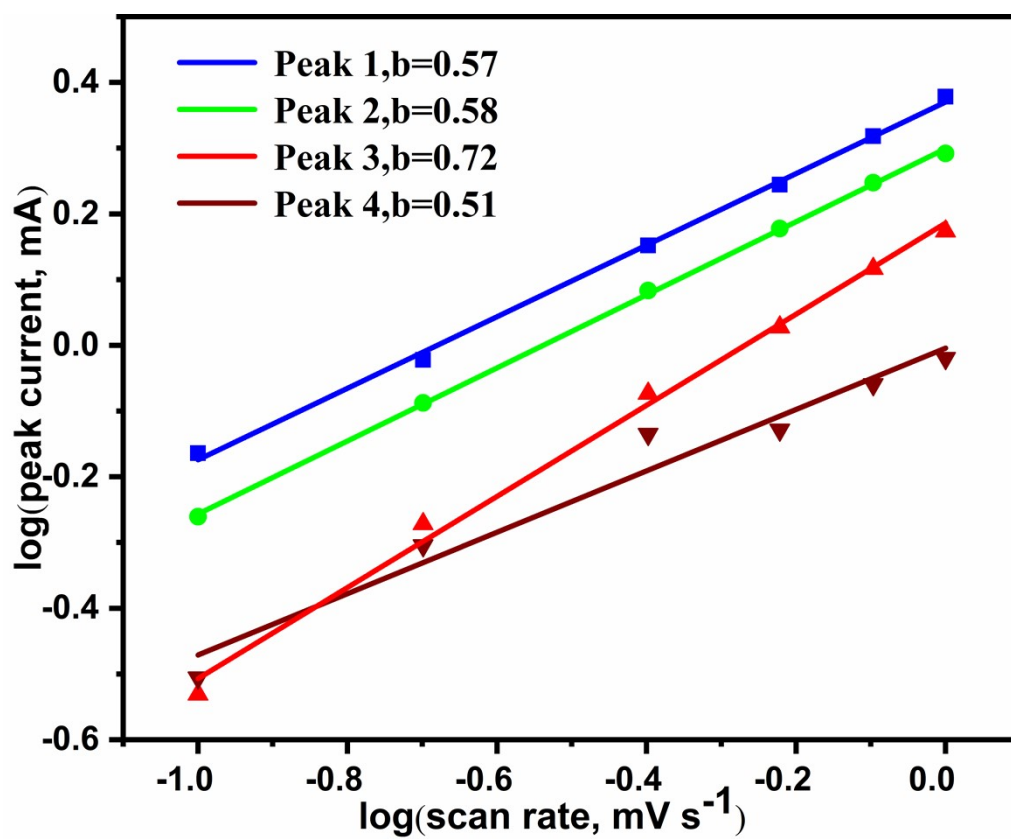

Figure S9 Corresponding  $\log(i)$  vs.  $\log(v)$  curves and  $b$  values.



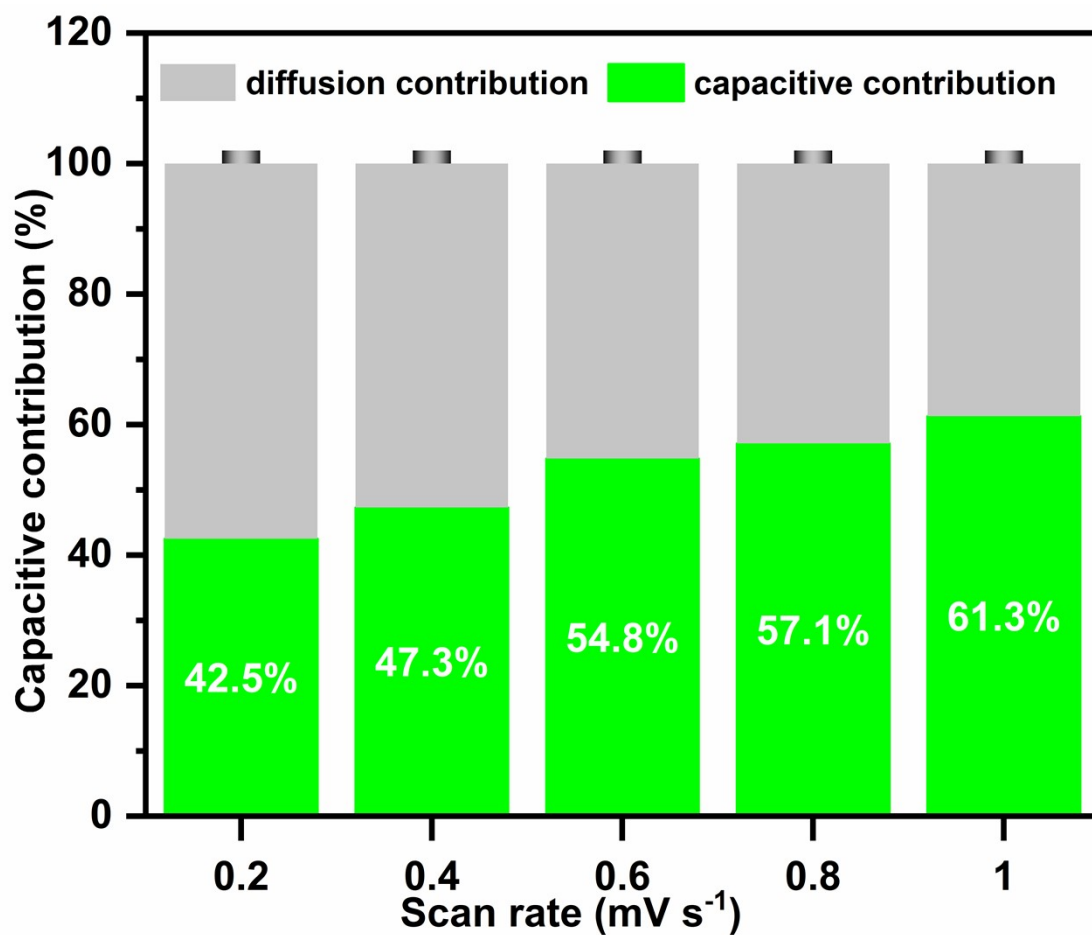

**Figure S10** Capacitance contribution (electrical double layer capacitance + pseudocapacitance) at different at different scan rates

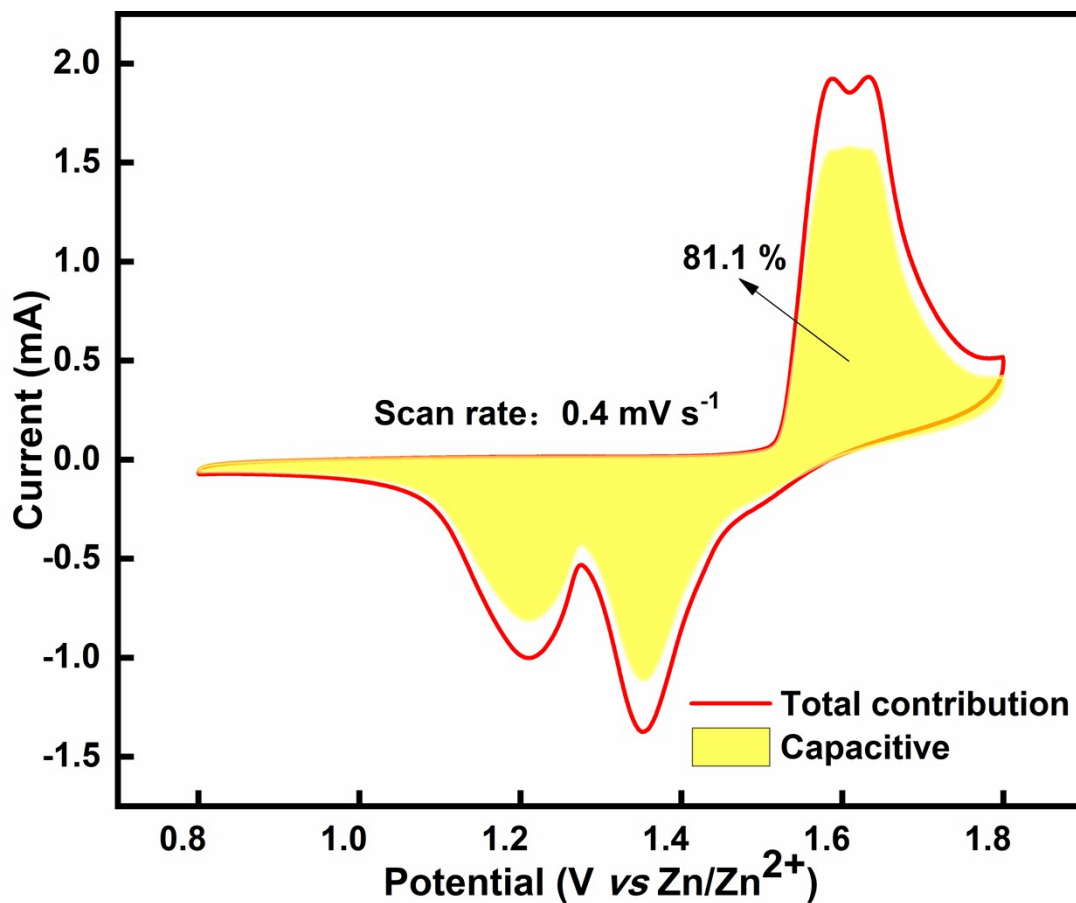

Figure S11 Ratio of capacitance contribution at 0.4 mV s<sup>-1</sup>.

**Table S4** Electrochemical performances of manganese-based cathode materials of AZIBs

| Cathodes                            | Electrolyte                                                                                                        | Specific capacity<br>(mAh g <sup>-1</sup> ) | Capacity retention<br>(%)                     | Ref. |
|-------------------------------------|--------------------------------------------------------------------------------------------------------------------|---------------------------------------------|-----------------------------------------------|------|
| ZnMn <sub>2</sub> O <sub>4</sub>    | 1 M ZnSO <sub>4</sub> + 0.05<br>M MnSO <sub>4</sub>                                                                | 106.5 (0.1 A g <sup>-1</sup> )              | 84 %<br>(300 cycles, 0.1 A g <sup>-1</sup> )  | [38] |
| Na <sub>0.95</sub> MnO <sub>2</sub> | 0.5 M<br>Zn(CH <sub>3</sub> COO) <sub>2</sub> + 0.5<br>M CH <sub>3</sub> COONa                                     | 60 (0.05 A g <sup>-1</sup> )                | 92 %<br>(2000 cycles, 0.2 A g <sup>-1</sup> ) | [39] |
| δ-MnO <sub>2</sub>                  | 1 M ZnSO <sub>4</sub>                                                                                              | 252 (0.08 A g <sup>-1</sup> )               | 44 %<br>(100 cycles, 0.08 A g <sup>-1</sup> ) | [40] |
| β-MnO <sub>2</sub>                  | 1 M ZnSO <sub>4</sub>                                                                                              | 180 (0.2 A g <sup>-1</sup> )                | 75 %<br>(200 cycles, 0.2 A g <sup>-1</sup> )  | [41] |
| β-MnO <sub>2</sub>                  | 3 M Zn(CF <sub>3</sub> SO <sub>3</sub> ) <sub>2</sub> +<br>0.1 M Mn(CF <sub>3</sub> SO <sub>3</sub> ) <sub>2</sub> | 225 (0.2 A g <sup>-1</sup> )                | 94 %<br>(2000 cycles, 2 A g <sup>-1</sup> )   | [42] |
| This work<br>ε-MnO <sub>2</sub>     | 2 M ZnSO <sub>4</sub> + 0.1 M<br>MnSO <sub>4</sub>                                                                 | 234 (0.2 A g <sup>-1</sup> )                | 91 %<br>(1000 cycles, 1 A g <sup>-1</sup> )   | /    |
